# Supplementary material for: Impact of circulating SARS-CoV-2 variants on mRNA vaccine-induced immunity in uninfected and previously infected individuals
Source: bioRxiv or medRxiv preprint supplement (doi:10.1101/2021.07.14.21260307), 2021-07-18
Supplement: Supplementary file [file media-1.pdf]

A) ● (0) Baseline      ● (3) 7 days post 2 dose      (-) Vaccinated- Non-previous infected  
 ● (1) 7 days post 1dose      ● (4) 28 days post 2dose      (+) Vaccinated- Previous infected  
 ● (2) 28 days post 1dose      ● (5) 70 days post 2dose

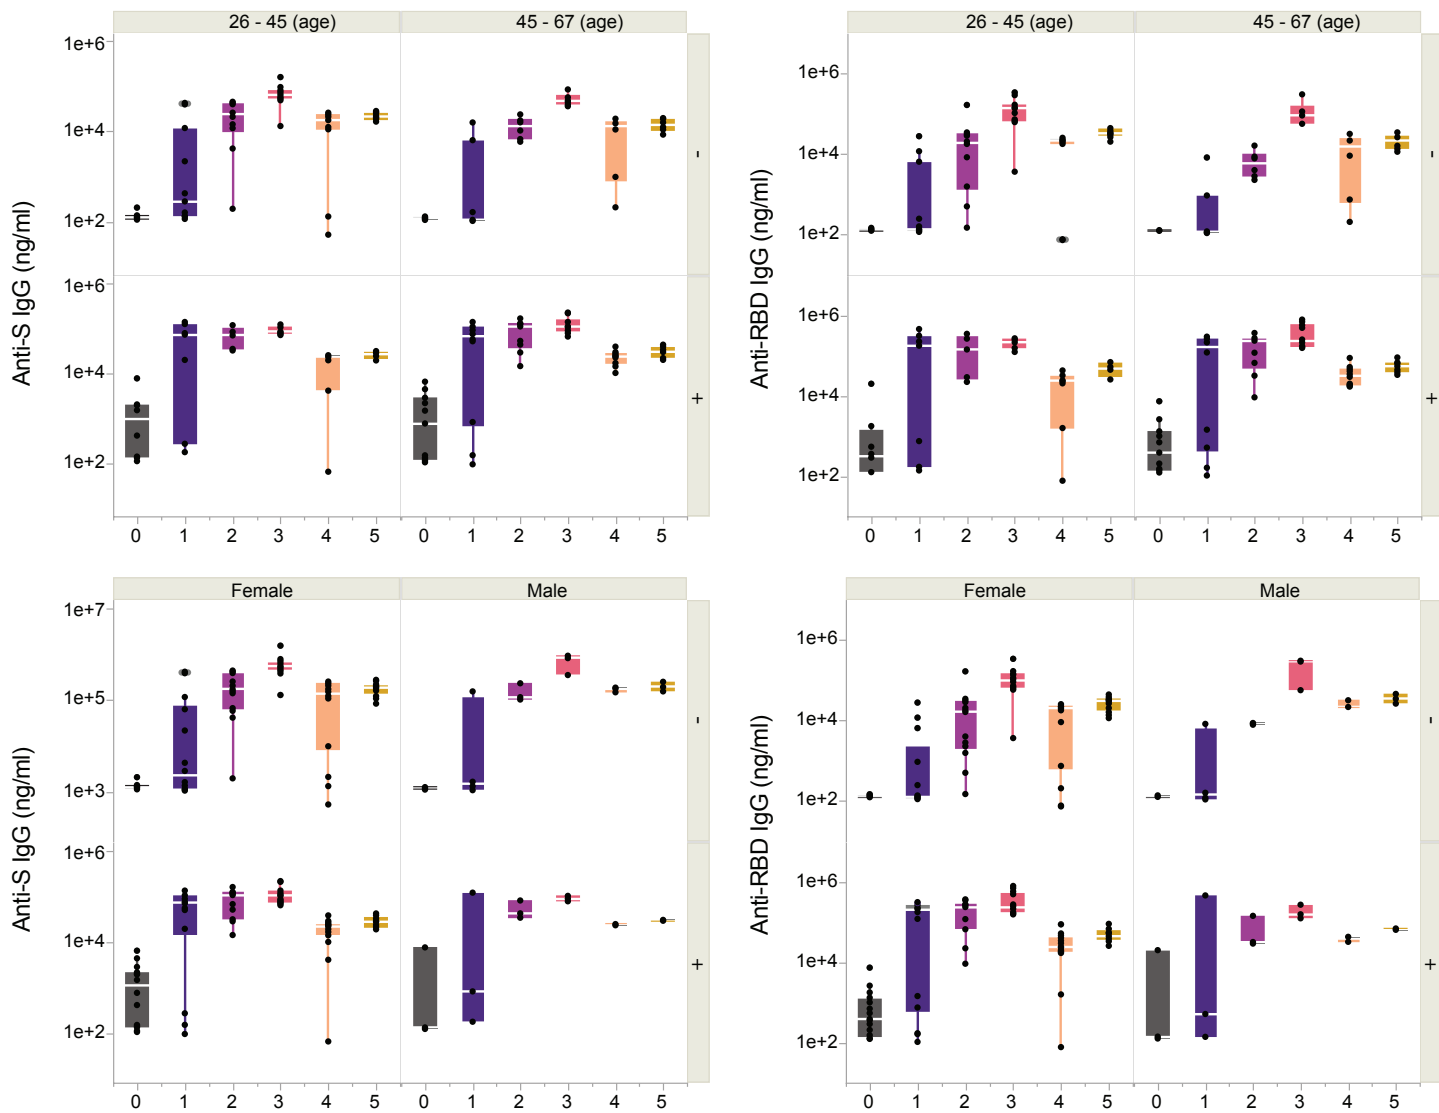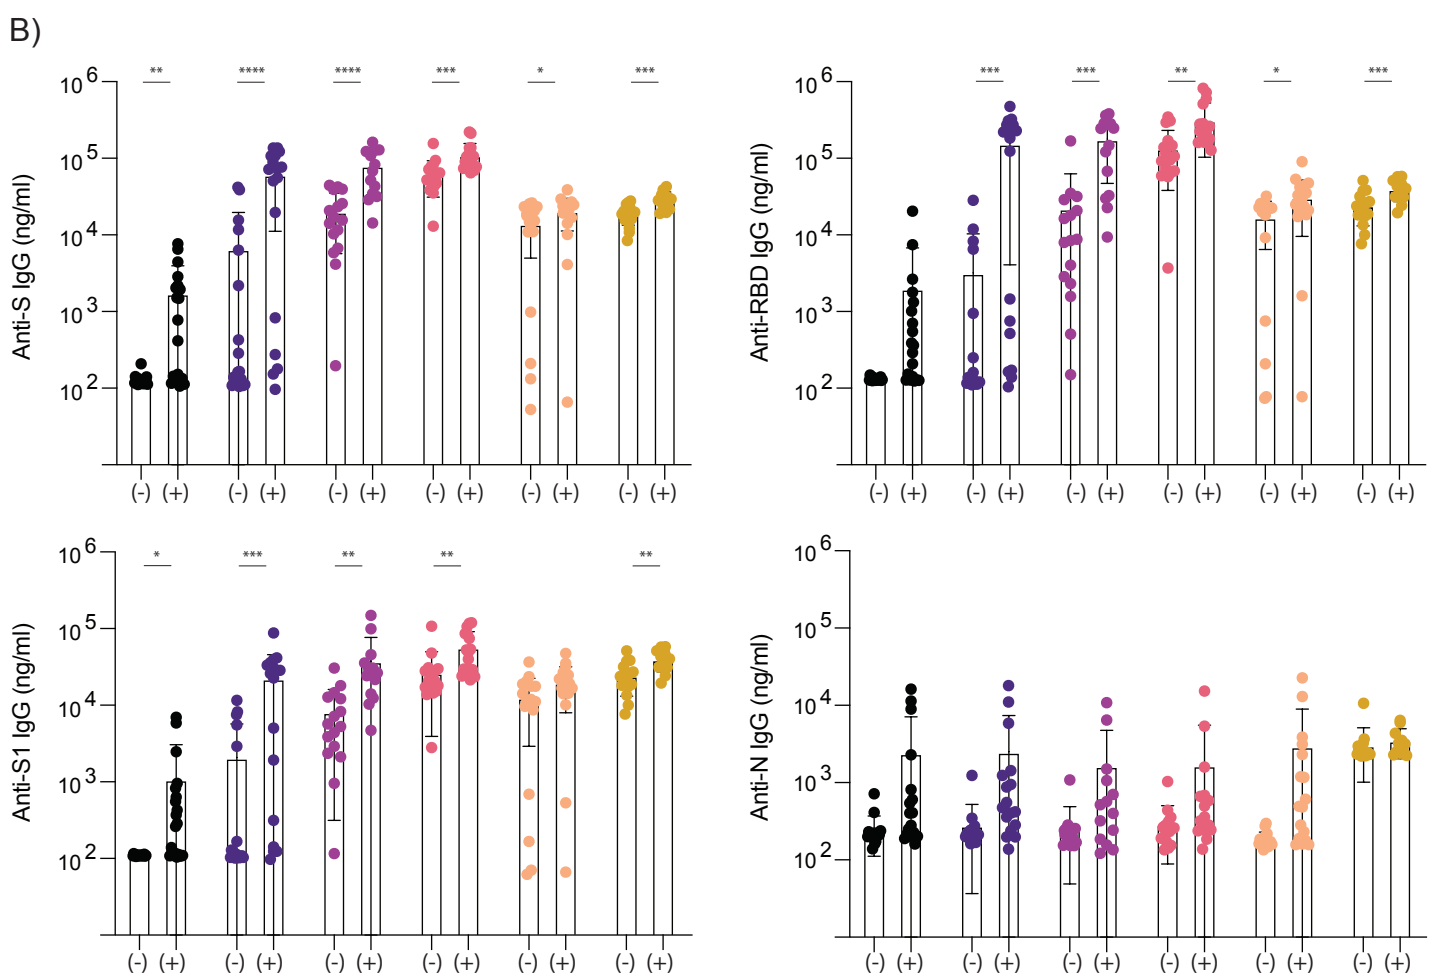

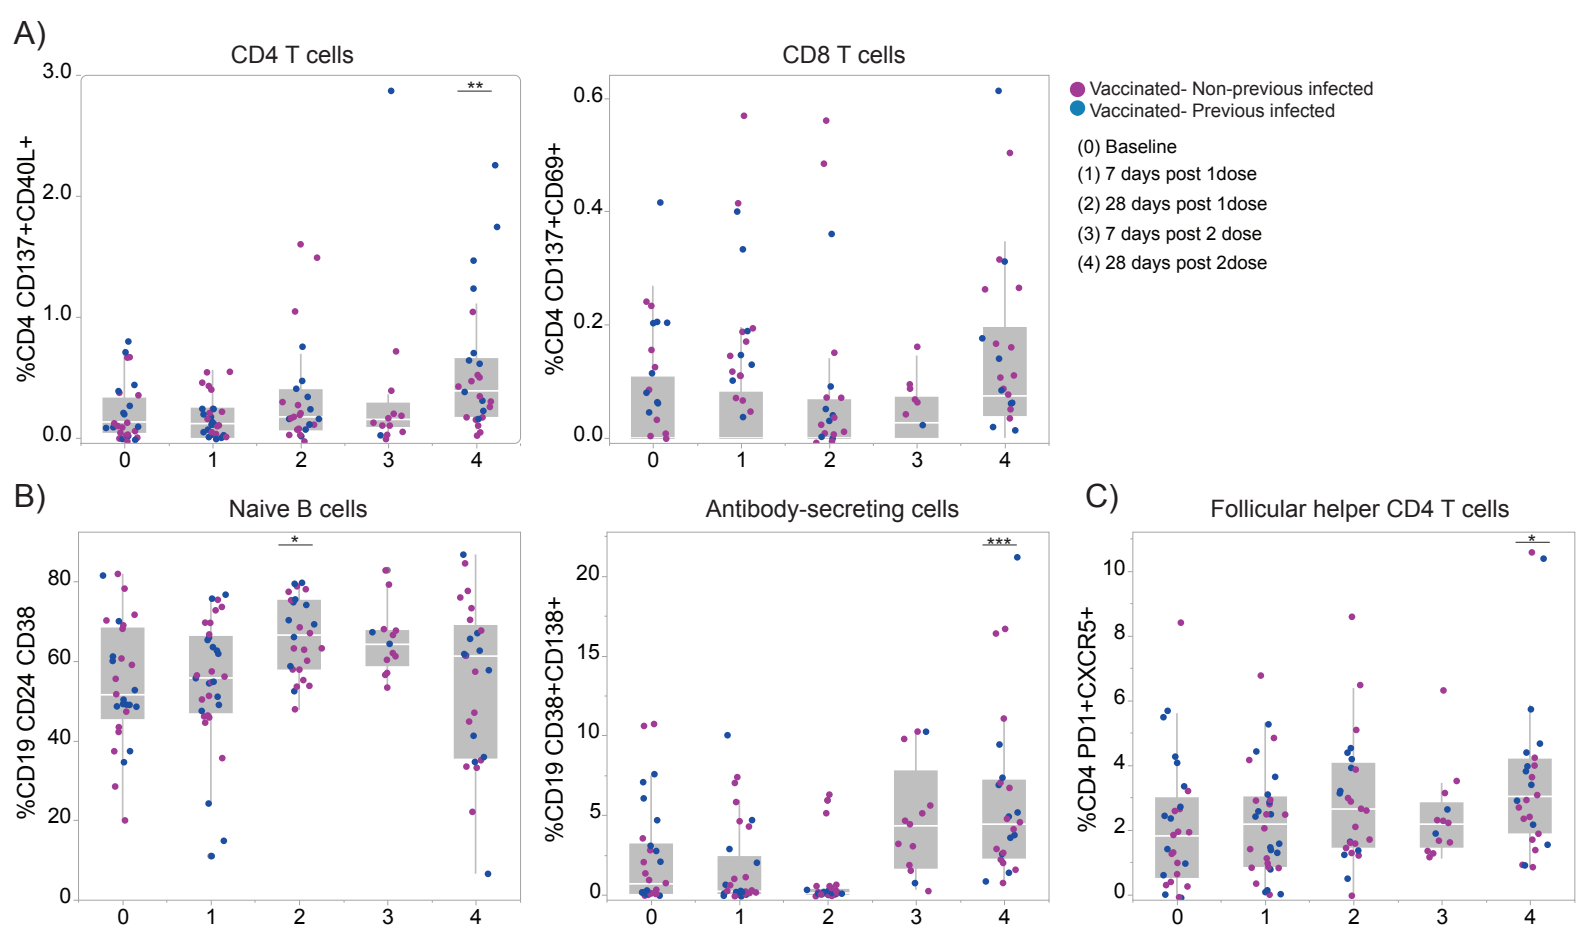

A)

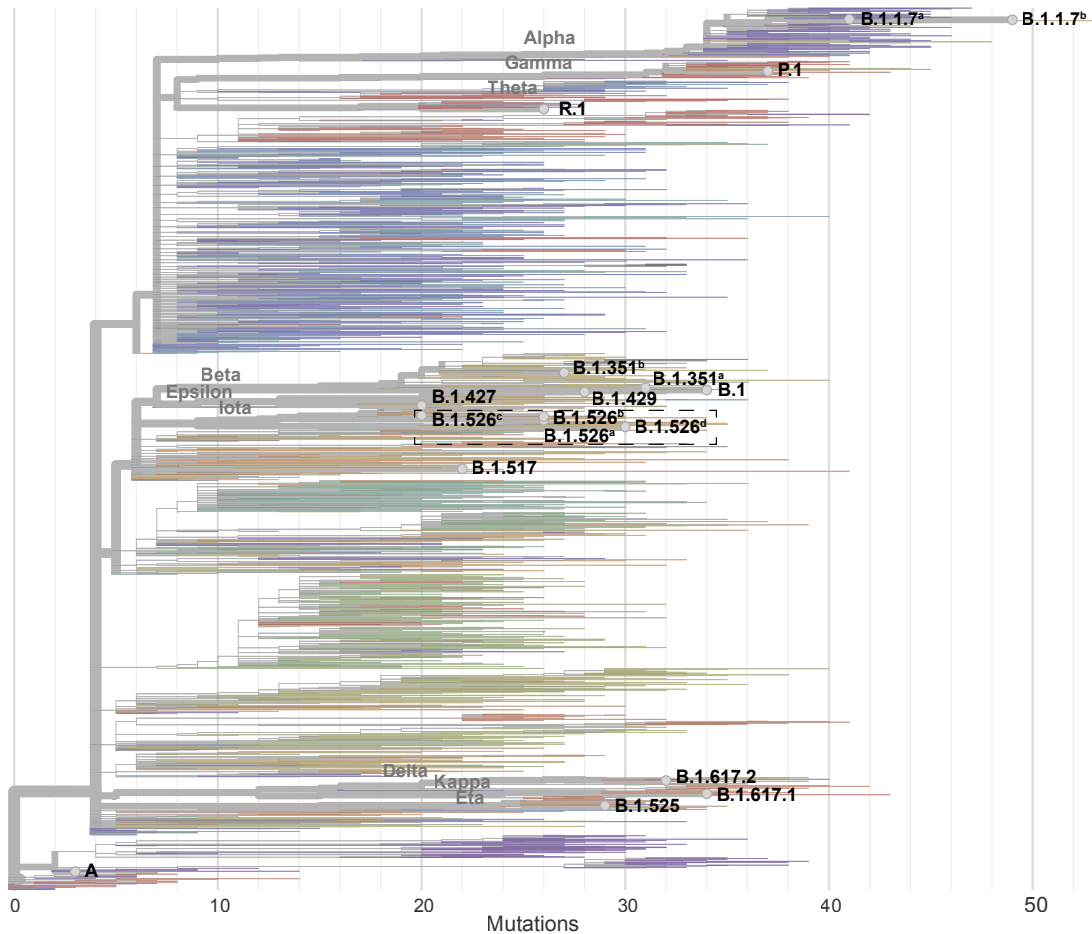

B)

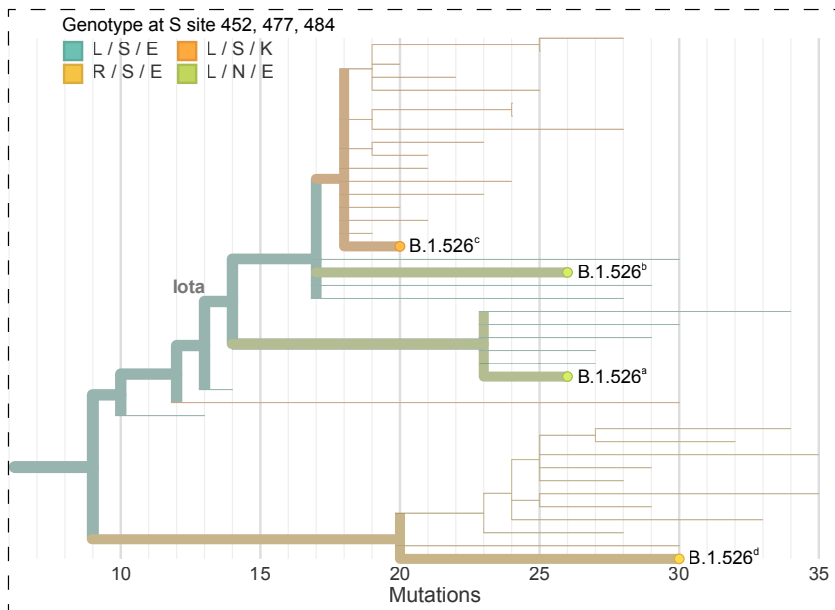

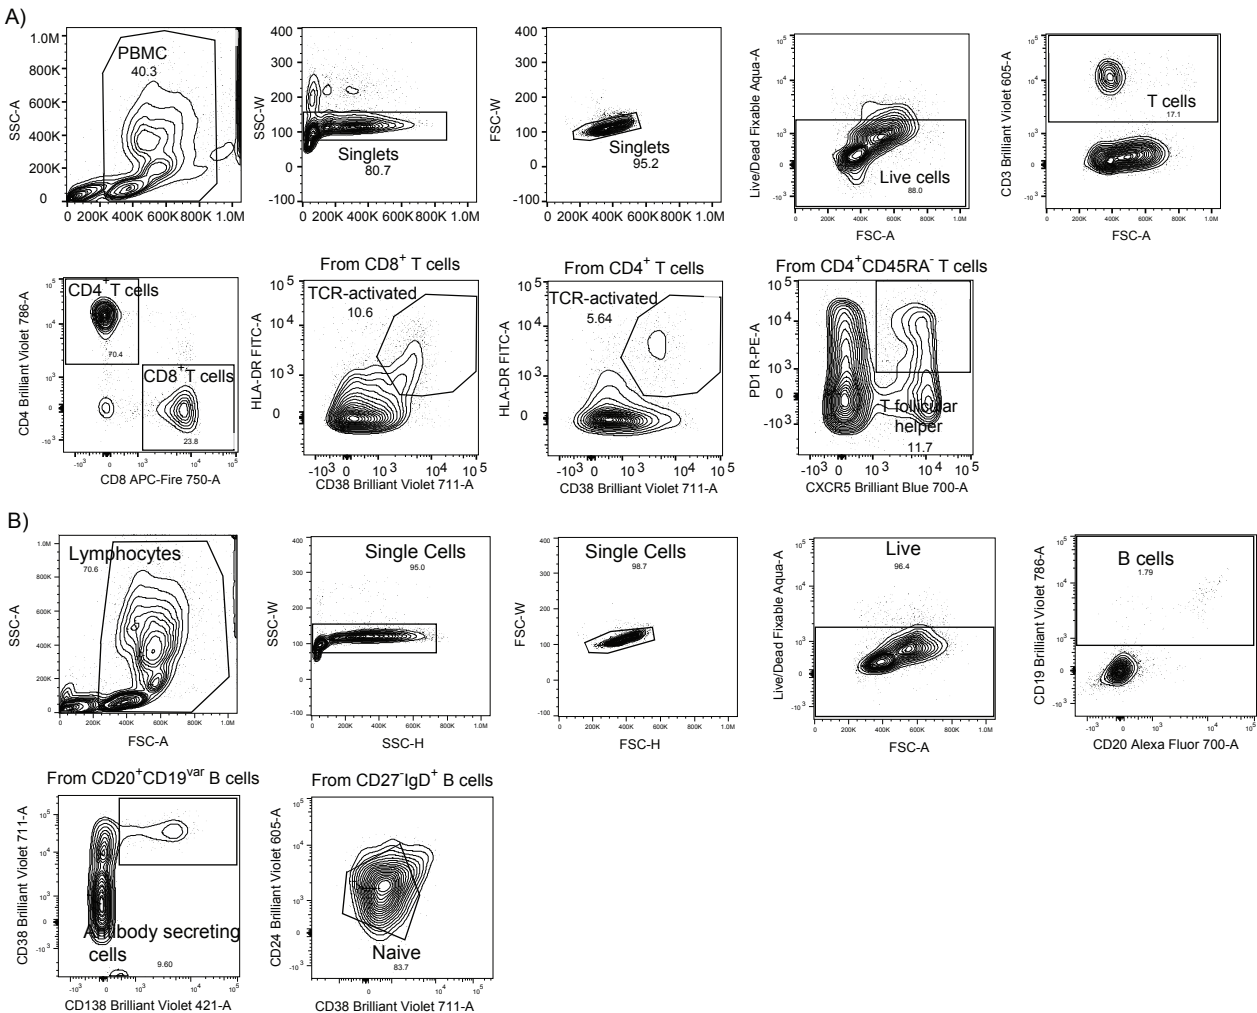

|                                | Age (years)           | Vaccine |        | Sex    |       | SeroStatus |          |
|--------------------------------|-----------------------|---------|--------|--------|-------|------------|----------|
|                                |                       | Moderna | Pfizer | Female | Male  | Negative   | Positive |
| <b>Total Cohort %</b>          | #DIV/0!               | 80.56   | 19.44  | 80.56  | 19.44 | 50.0       | 50.0     |
| <b>Non- Previous exposed %</b> | 44.28 (1.833 ± 4.242) | 61.11   | 38.88  | 77.7   | 83.33 |            |          |
| <b>Previous exposed %</b>      | 46.11 (1.833 ± 4.242) | 100.0   | 0.0    | 22.22  | 16.66 |            |          |

| Volunteers ID | Age range | Sex    | SeroStatus | Vaccine | Age Range |       |
|---------------|-----------|--------|------------|---------|-----------|-------|
| 1             | B         | Female | Negative   | Pfizer  | A         | 26-35 |
| 2             | B         | Female | Negative   | Pfizer  | B         | 36-45 |
| 3             | B         | Female | Negative   | Moderna | C         | 46-55 |
| 4             | C         | Female | Negative   | Moderna | D         | 56-65 |
| 5             | C         | Female | Negative   | Pfizer  | E         | 66-75 |
| 6             | B         | Female | Negative   | Pfizer  |           |       |
| 7             | E         | Female | Negative   | Moderna |           |       |
| 8             | B         | Female | Negative   | Moderna |           |       |
| 9             | C         | Male   | Negative   | Moderna |           |       |
| 10            | A         | Female | Negative   | Pfizer  |           |       |
| 11            | B         | Female | Negative   | Moderna |           |       |
| 12            | B         | Male   | Negative   | Moderna |           |       |
| 13            | D         | Male   | Negative   | Moderna |           |       |
| 14            | A         | Female | Negative   | Moderna |           |       |
| 15            | D         | Female | Negative   | Pfizer  |           |       |
| 16            | B         | Female | Negative   | Moderna |           |       |
| 17            | A         | Female | Negative   | Moderna |           |       |
| 18            | C         | Male   | Negative   | Pfizer  |           |       |
| 20            | D         | Female | Positive   | Moderna |           |       |
| 21            | A         | Female | Positive   | Moderna |           |       |
| 22            | D         | Female | Positive   | Moderna |           |       |
| 24            | E         | Female | Positive   | Moderna |           |       |
| 25            | C         | Female | Positive   | Moderna |           |       |
| 26            | B         | Female | Positive   | Moderna |           |       |
| 27            | C         | Male   | Positive   | Moderna |           |       |
| 28            | D         | Female | Positive   | Moderna |           |       |
| 30            | A         | Male   | Positive   | Moderna |           |       |
| 31            | A         | Female | Positive   | Moderna |           |       |
| 32            | C         | Female | Positive   | Moderna |           |       |
| 33            | A         | Female | Positive   | Moderna |           |       |
| 34            | A         | Female | Positive   | Moderna |           |       |
| 35            | C         | Female | Positive   | Moderna |           |       |
| 36            | D         | Female | pOsitive   | Moderna |           |       |
| 37            | D         | Female | Positive   | Moderna |           |       |
| 38            | D         | Female | Positive   | Moderna |           |       |
| 39            | A         | Male   | Positive   | Moderna |           |       |

| Lineage<br>GenBank<br>Accession | A    | B.1.526 <sup>a</sup><br>MZ467323                                            | B.1.526 <sup>b</sup><br>MZ467333                                  | B.1.1.7 <sup>a</sup><br>MZ202178                                             | B.1.517<br>MZ468008               | B.1.526 <sup>c</sup><br>MZ201303                         | B.1.617.2<br>MZ468047                                                                           | R.1<br>MZ467697                           | B.1.427<br>MZ467318             | B.1.526 <sup>d</sup><br>MZ467322                                    | B.1.429<br>MZ467319             | B.1.525<br>MZ467313                                                       | B.1.617.1<br>MZ468046                                                                                                       | P.1<br>MZ202306                                                                                          | B.1<br>MZ467989                                                                                        | B.1.1.7 <sup>b</sup><br>MZ467988                                                              | B.1.351 <sup>a</sup><br>MZ468007                                                                                                            | B.1.351 <sup>b</sup><br>MZ202314                                                                                                                    |
|---------------------------------|------|-----------------------------------------------------------------------------|-------------------------------------------------------------------|------------------------------------------------------------------------------|-----------------------------------|----------------------------------------------------------|-------------------------------------------------------------------------------------------------|-------------------------------------------|---------------------------------|---------------------------------------------------------------------|---------------------------------|---------------------------------------------------------------------------|-----------------------------------------------------------------------------------------------------------------------------|----------------------------------------------------------------------------------------------------------|--------------------------------------------------------------------------------------------------------|-----------------------------------------------------------------------------------------------|---------------------------------------------------------------------------------------------------------------------------------------------|-----------------------------------------------------------------------------------------------------------------------------------------------------|
| E                               |      |                                                                             |                                                                   |                                                                              |                                   |                                                          | V62F                                                                                            |                                           |                                 |                                                                     |                                 |                                                                           | L21F                                                                                                                        |                                                                                                          |                                                                                                        |                                                                                               | P71L                                                                                                                                        | P71L                                                                                                                                                |
| M                               |      |                                                                             |                                                                   |                                                                              |                                   |                                                          | I82T                                                                                            | F28L<br>T175M                             |                                 |                                                                     |                                 |                                                                           | I82T                                                                                                                        | I82S                                                                                                     |                                                                                                        |                                                                                               |                                                                                                                                             |                                                                                                                                                     |
| N                               |      | P13L<br>S202R<br>A414V                                                      | P199L<br>M234I                                                    | D3L<br>R203K<br>G204R<br>S235F                                               | S206F                             | P199L<br>M234I                                           | D63G<br>R203M<br>D377Y                                                                          | S187L<br>R203K<br>G204R<br>Q418H          | T205I<br>T362I                  | T205I<br>M234I                                                      | T205I<br>M234I                  | M1-<br>S2M<br>D3Y<br>A12G<br>T205I                                        | R203M<br>D377Y                                                                                                              | P80R<br>R203K<br>G204R                                                                                   | D3Y<br>T205I                                                                                           | D3L<br>R203K<br>G204R<br>S235F                                                                | T205I                                                                                                                                       | T205I                                                                                                                                               |
| ORF1a                           |      | T265I<br>T1840I<br>G1946S<br>L3201P<br>L3201P<br>S3675-<br>G3676-<br>F3677- | T265I<br>A1352V<br>L3201P<br>P3504S<br>S3675-<br>G3676-<br>F3677- | T1001I<br>P1213L<br>A1708D<br>I2230T<br>M2259I<br>S3675-<br>G3676-<br>F3677- | T265I<br>A541S<br>G989V<br>H1580Y | T265I<br>T2977I<br>L3201P<br>S3675-<br>G3676-<br>F3677-  | P309L<br>A405V<br>P1640L<br>A3209V<br>V3718A                                                    |                                           | T265I<br>S3158T                 | T265I<br>T2087I<br>K3162E                                           | T265I<br>I4205V                 | T2007I<br>L2609I<br>S3675-<br>G3676-<br>F3677-                            | T1567I<br>T3646A                                                                                                            | S1188L<br>K1795Q<br>G2941S<br>V649F<br>S3675-<br>T708I<br>A1049V<br>T1854I<br>K2497N<br>R3542C<br>M4375T | G150S<br>T265I<br>V649F<br>T708I<br>A1049V<br>T1854I<br>M2259I<br>S3675-<br>G3676-<br>S3675-<br>M4375T | E913D<br>T1001I<br>A1306T<br>A1708D<br>P2046L<br>I2230T<br>M2259I<br>G3676-<br>F3677-         | T265I<br>T333M<br>Y1598C<br>K1655N<br>K1655N<br>E1843D<br>T2174I<br>K3353R<br>S3675-<br>G3676-<br>F3677-                                    | T265I<br>K1655N<br>S3675-<br>G3676-<br>F3677-<br>L3736F<br>T4065I<br>L3829F                                                                         |
| ORF1b                           |      | P314L<br>Q1011H                                                             | P314L<br>Q1011H                                                   | P218L<br>P314L<br>A1432V                                                     | P314L<br>D1506N<br>P2633S         | P314L<br>Q1011H<br>R1078C                                | P314L<br>G662S<br>P1000L<br>P1570L                                                              | P314L<br>G814C<br>D1183Y<br>P1936H        | P314L<br>P976L                  | P314L                                                               | P314L<br>D1183Y<br>G2436C       | P314F                                                                     | P314L<br>G1129C<br>A1291S<br>M1352I<br>K2310R<br>S2312A                                                                     | P314L<br>A1219S<br>E1264D                                                                                | T132I<br>P314L                                                                                         | P218L<br>P314L<br>T1511I                                                                      | P314L<br>T1050I<br>Y2608H                                                                                                                   | P314L                                                                                                                                               |
| ORF3a                           |      | P42L<br>Q57H                                                                | P42L<br>Q57H                                                      | Q57H<br>D210E                                                                | P42L<br>Q57H                      | S26L                                                     | Q57H                                                                                            | P42L<br>Q57H                              | Q57H                            | P42L<br>Q57H                                                        | Q57H                            | S92L                                                                      | S26L<br>Q57H<br>S253P<br>P104S<br>S171L                                                                                     | Q57H<br>P104S<br>S171L                                                                                   |                                                                                                        | Q57H<br>S171L                                                                                 | Q57H<br>W131L<br>S171L                                                                                                                      |                                                                                                                                                     |
| ORF6                            |      |                                                                             |                                                                   |                                                                              |                                   |                                                          |                                                                                                 |                                           |                                 |                                                                     |                                 | M1-<br>F2M                                                                |                                                                                                                             |                                                                                                          |                                                                                                        |                                                                                               |                                                                                                                                             |                                                                                                                                                     |
| ORF7a                           |      | L116F                                                                       |                                                                   |                                                                              |                                   |                                                          | V82A<br>L116F<br>T120I                                                                          |                                           |                                 | P34S                                                                |                                 | A105S<br>N43Y<br>V82A                                                     |                                                                                                                             |                                                                                                          |                                                                                                        |                                                                                               |                                                                                                                                             | V93F                                                                                                                                                |
| ORF8                            | L84S | T11I                                                                        | T11I                                                              | Q27*<br>R52I<br>K68*<br>Y73C                                                 | E59*                              | T11I                                                     | D119-<br>F120-                                                                                  |                                           |                                 | T11I<br>P36S<br>A51S                                                | V100L                           |                                                                           |                                                                                                                             | E92K                                                                                                     | E106D                                                                                                  | Q27*<br>R52I<br>K68*<br>Y73C                                                                  | I121L                                                                                                                                       | R115L                                                                                                                                               |
| ORF9b                           |      | P10S                                                                        | T83I                                                              |                                                                              |                                   |                                                          | T60A                                                                                            |                                           |                                 |                                                                     |                                 | H9D                                                                       |                                                                                                                             | Q77E                                                                                                     |                                                                                                        |                                                                                               |                                                                                                                                             |                                                                                                                                                     |
| S                               |      | L5F<br>T95I<br>D253G<br>S477N<br>D614G<br>Q957R                             | L5F<br>T95I<br>D253G<br>S477N<br>D614G<br>A701V                   | H69-<br>V70-<br>Y144-<br>N501Y<br>A570D<br>D614G<br>T716I<br>S982A<br>D1118H | N501T<br>Q613H<br>D614G<br>G639V  | L5F<br>T95I<br>D253G<br>E484K<br>R158G<br>D614G<br>A701V | T19R<br>E156-<br>F157-<br>R158G<br>D614G<br>L452R<br>T478K<br>D614G<br>P681R<br>D950N<br>L1141W | W152L<br>E484K<br>L452R<br>D614G<br>G769V | S13I<br>W152C<br>L452R<br>D614G | D80G<br>Y144-<br>F157S<br>L452R<br>D614G<br>T791I<br>T859N<br>D950H | S13I<br>W152C<br>L452R<br>D614G | H69-<br>V70-<br>Y144-<br>Q52R<br>A67V<br>E484K<br>D614G<br>Q677H<br>F888L | T95I<br>G142D<br>E154K<br>L452R<br>D138Y<br>R190S<br>D614G<br>K417T<br>E484K<br>N501Y<br>D614G<br>H655Y<br>T1027I<br>V1176F | L18F<br>T20N<br>N501T<br>D614G<br>E484K<br>L241Y<br>N501Y<br>D614G<br>S982A<br>D1118H                    | E484K<br>N501T<br>D614G<br>E484K<br>N501Y<br>D614G<br>S982A<br>D1118H                                  | H69-<br>V70-<br>Y144-<br>E484K<br>N501Y<br>D614G<br>E484K<br>N501Y<br>D614G<br>A701V<br>D614G | D80A<br>D215G<br>L241-<br>L241-<br>A243-<br>L242-<br>A243-<br>K417N<br>E484K<br>N501Y<br>D614G<br>A701V<br>D614G<br>Q677H<br>R682W<br>A701V | L18F<br>D80A<br>D215G<br>L241-<br>L241-<br>A243-<br>L242-<br>A243-<br>K417N<br>E484K<br>N501Y<br>D614G<br>A701V<br>D614G<br>Q677H<br>R682W<br>A701V |

Abbreviations: E = envelope, M = membrane, N = nucleocapsid, ORF = open reading frame, S = spike.
